# Supplementary material for: Newly Diagnosed Primary Open-Angle Glaucoma Randomized to 2 Trabecular Bypass Stents or Prostaglandin: Outcomes Through 36 Months
Source: PubMed Central journal article supplement — Ophthalmol Ther. 2016 Sep 12;5(2):161–72. doi: 10.1007/s40123-016-0065-3 (PMC5125126; doi:10.1007/s40123-016-0065-3), 2016-09-12
Supplement: 40123_2016_65_MOESM1_ESM.pdf [file 40123_2016_65_MOESM1_ESM.pdf]

**Appendix 1.** List of Participating MIGS Study Group Surgeons

| <b>Surgeon Name</b>                   | <b>Affiliation</b>                                                             | <b>Study Participation</b> |
|---------------------------------------|--------------------------------------------------------------------------------|----------------------------|
| Iqbal Ike K. Ahmed, MD                | University of Toronto,<br>Toronto, Ontario, Canada                             | Visiting surgeon           |
| Leon Au, FRCOphth                     | Manchester Royal Eye Hospital<br>Manchester UK                                 | Visiting surgeon           |
| Jose I. Belda Sanchis, MD             | Hospital de Torrevieja<br>Alicante, Spain                                      | Visiting surgeon           |
| Gerd Auffarth, MD                     | University Hospital Heidelberg<br>Heidelberg, Germany                          | Visiting surgeon           |
| Anselm Jünemann, MD                   | University Hospital<br>Erlangen, Erlangen, Germany                             | Visiting surgeon           |
| Malik Kahook, MD                      | University of Colorado School of<br>Medicine<br>Aurora, CO, USA                | Visiting surgeon           |
| Jose Maria Martinez de la Casa,<br>MD | University Complutense of Madrid,<br>Madrid, Spain                             | Visiting surgeon           |
| Imran Masood, FRCOphth                | Birmingham City Hospital Birmingham,<br>UK                                     | Visiting surgeon           |
| Hady Saheb, MD                        | McGill University<br>Montreal, QC, Canada                                      | Visiting surgeon           |
| Manfred Tetz, MD                      | Berlin Eye Research Institute and<br>Augenklinik Spreebogen<br>Berlin, Germany | Visiting surgeon           |
| Steven D. Vold, MD                    | Vold Vision, PLLC<br>Fayetteville, AR, USA                                     | Visiting surgeon           |
| Lilit Voskanyan, MD                   | S.V. Malayan Ophthalmology<br>Centre, Yerevan, Armenia                         | Staff surgeon              |

**Medical Monitor:** L.J. Katz, MD, Wills Eye Hospital, Jefferson Medical College, Philadelphia, PA, USA.
